# Supplementary material for: Familial Alzheimer’s Disease Neurons Bearing Mutations in PSEN1 Display Increased Calcium Responses to AMPA as an Early Calcium Dysregulation Phenotype
Source: Preprints.org preprint supplement (doi:10.20944/preprints202402.1721.v1), 2024-02-29
Supplement: Supplementary file 1 [file supplementary]

Supplementary data

Supp Fig 1.


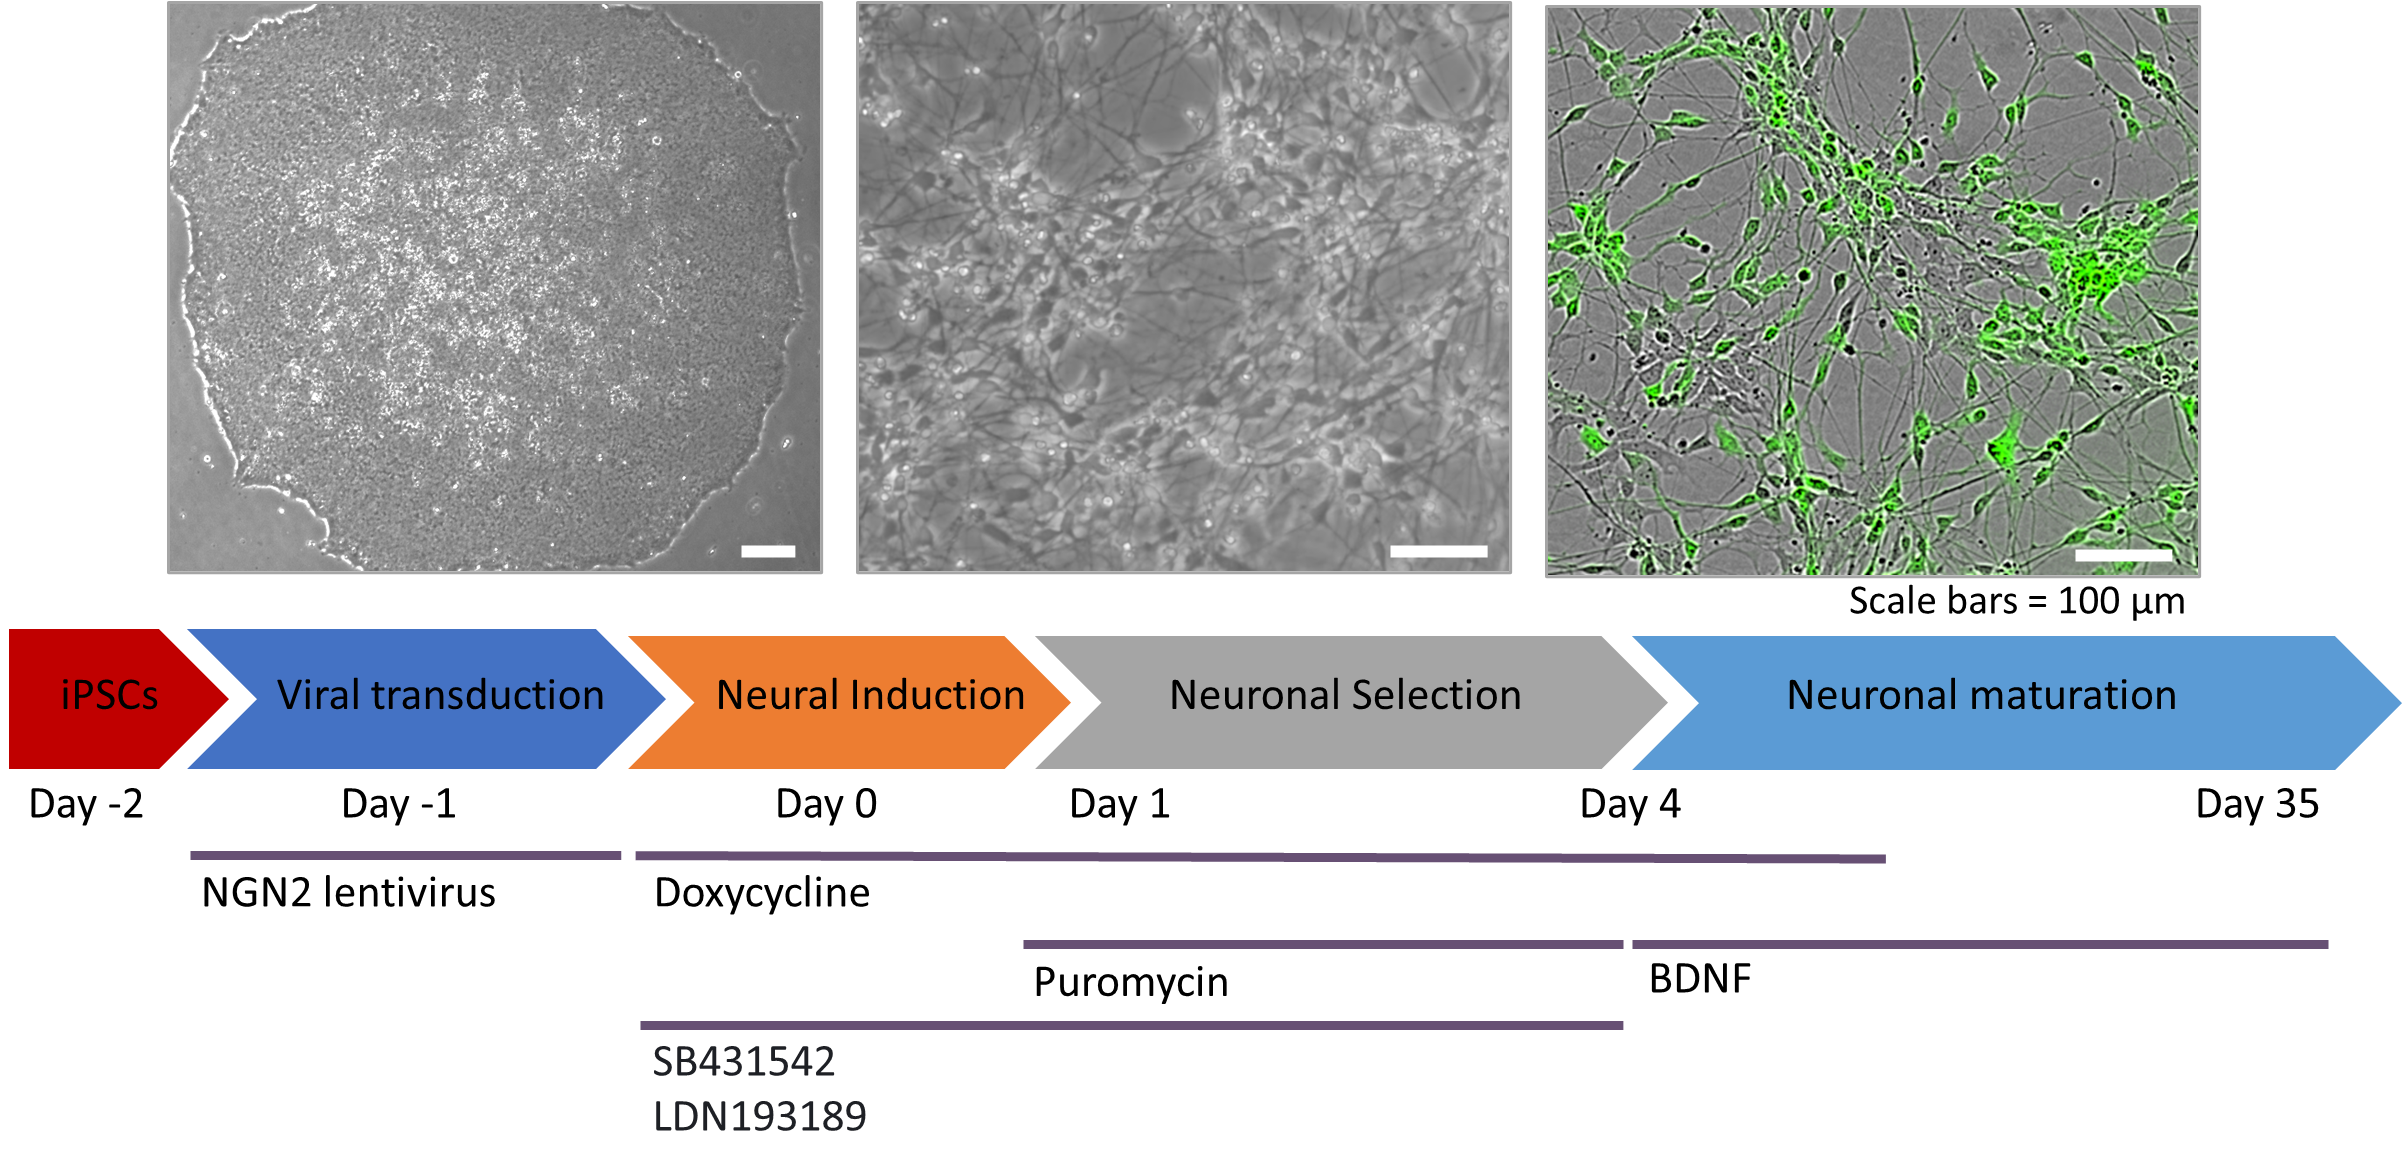


Supp. Fig. 1. Representative images and timeline of differentiation. Images show pluripotent stem cell colony and neurons after 35days of differentiation. Expression of GFP confirms expression of the lentiviral Ngn2 construct. Protocol as per Nehme et al., 2018.
